# Supplementary material for: Microbial Changes and Host Response in F344 Rat Colon Depending on Sex and Age Following a High-Fat Diet
Source: PubMed Central journal article supplement (PMC6160749; doi:10.3389/fmicb.2018.02236), 2018-09-21
Supplement: Image_4.pdf [file Image_4.pdf]

*Supplementary Material*

**Microbial changes and host response in F344 rat colon depending on sex and age following a high-fat diet**

Sun Min Lee, Nayoung Kim\*, Hyuk Yoon, Ryoung Hee Nam, Dong Ho Lee

\* **Correspondence:** Nayoung Kim: nakim49@snu.ac.kr

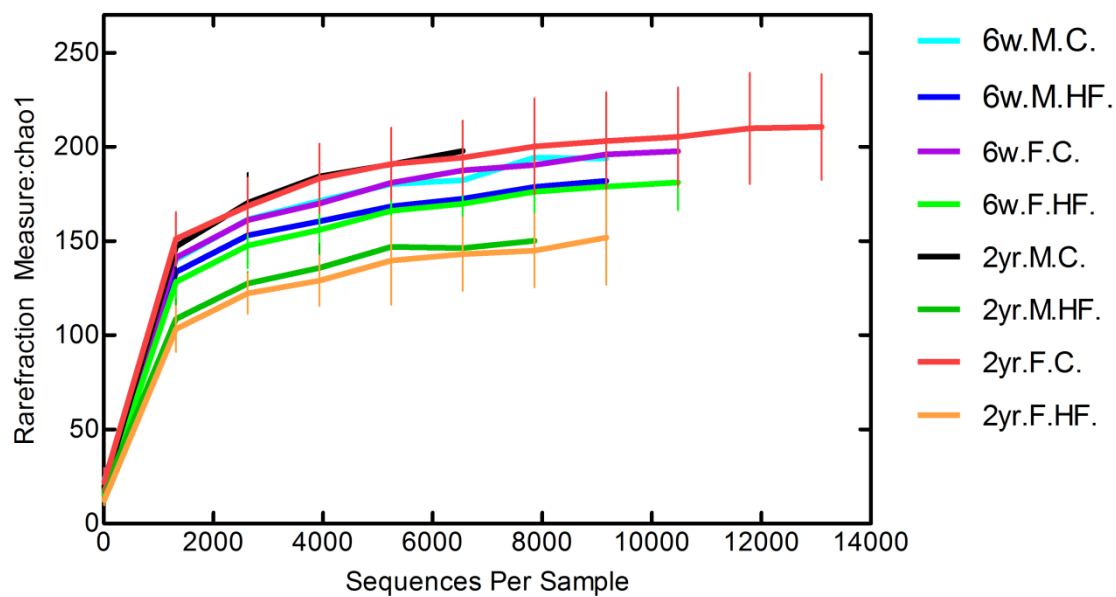

**Supplementary Figure S4.** Rarefaction curves of Chao1.
