# Supplementary material for: Microbial Changes and Host Response in F344 Rat Colon Depending on Sex and Age Following a High-Fat Diet
Source: Front Microbiol. 2018 Sep 21;9:2236. doi: 10.3389/fmicb.2018.02236 (PMC6160749; doi:10.3389/fmicb.2018.02236)
Supplement: Supplementary file 3 [file Data_Sheet_1.XLSX]

## Sheet: Biplot
PCA - Bioplot
2yrF										2yrM
6wF										6wM

## Sheet: 6wM
Dataset S1. List of species used for PAC. The list of microbial species used for generation of PCA biplots. Microbial species with statistically significant relative OTU abundance in the metagenome were used for PCA analysis.
p-value	Species	6w.M.C1	6w.M.C2	6w.M.C3	6w.M.C4	6w.M.C5	6w.M.C6	6w.M.HF1	6w.M.HF2	6w.M.HF3	6w.M.HF4	6w.M.HF5	6w.M.HF6		Genus	6w.M.C1	6w.M.C2	6w.M.C3	6w.M.C4	6w.M.C5	6w.M.C6	6w.M.HF1	6w.M.HF2	6w.M.HF3	6w.M.HF4	6w.M.HF5	6w.M.HF6		Phylum	6w.M.C1	6w.M.C2	6w.M.C3	6w.M.C4	6w.M.C5	6w.M.C6	6w.M.HF1	6w.M.HF2	6w.M.HF3	6w.M.HF4	6w.M.HF5	6w.M.HF6
0.0021645	Vallitalea pronyensis	0.0342	0.0558	0.0621	0.0944	0.015	0.0644	0.0017	0.002	0.0005	0.0039	0.003	0.0019		Vallitalea	0.0342	0.0558	0.0621	0.0944	0.015	0.0644	0.0017	0.002	0.0005	0.0039	0.003	0.0019		Firmicutes	0.1432	0.224	0.233	0.2556	0.213	0.3292	0.0644	0.0414	0.1311	0.1282	0.1776	0.0822
0.0021645	[Clostridium] lactatifermentans	0.0001	0.0004	0.0003	0.0004	0.0011	0.0008	0.0023	0.0013	0.0096	0.0053	0.0084	0.0051		[Clostridium]	0.0354	0.0961	0.0658	0.0543	0.089	0.1366	0.013	0.0025	0.0141	0.0229	0.0114	0.0106		Verrucomicrobia	0.0592	0.041	0.0031	0.0014	0.0481	0.0038	0.1806	0.103	0.1146	0.1001	0.1249	0.1767
0.0021645	Papillibacter cinnamivorans	0.0051	0.0021	0.0023	0.0055	0.0024	0.0507	0	0.0001	0.0003	0.0012	0.0001	0.0004		Papillibacter	0.0051	0.0021	0.0023	0.0055	0.0024	0.0507	0	0.0001	0.0003	0.0012	0.0001	0.0004		Bacteroidetes	0.1211	0.1073	0.2438	0.3707	0.3058	0.3237	0.3309	0.434	0.2527	0.1262	0.1926	0.3745
0.0021645	Sporobacter termitidis	0.0016	0.0025	0.0028	0.0021	0.0016	0.0028	0.0001	0.0001	0.0007	0.0005	0.0006	0.001		Sporobacter	0.0016	0.0025	0.0028	0.0021	0.0016	0.0028	0.0001	0.0001	0.0007	0.0005	0.0006	0.001		Proteobacteria	0.0217	0.0075	0.0028	0.0084	0.028	0.0209	0.0219	0.0637	0.0587	0.1194	0.0745	0.0148
0.0021645	Akkermansia muciniphila	0.0592	0.041	0.0031	0.0014	0.0481	0.0038	0.1806	0.103	0.1146	0.1001	0.1249	0.1767		Akkermansia	0.0592	0.041	0.0031	0.0014	0.0481	0.0038	0.1806	0.103	0.1146	0.1001	0.1249	0.1767		Lentisphaerae	0	0	0	0	0	0	0.003	0.0015	0.0019	0	0.0005	0.0015
0.00277843	Ruminococcus faecis	0.0003	0.0008	0.0001	0.0019	0.0119	0.0025	0	0	0	0	0	0		Ruminococcus	0.0127	0.0158	0.0165	0.0087	0.0683	0.0132	0	0.0007	0.0007	0.0055	0.0003	0.0006
0.00277843	Phascolarctobacterium faecium	0	0	0	0	0	0	0.0406	0.0211	0.0943	0.0585	0.1282	0.0544		Phascolarctobacterium	0	0	0	0	0	0	0.0406	0.0211	0.0943	0.0585	0.1282	0.0544
0.00366455	Roseburia hominis	0.0001	0	0	0	0	0	0.0013	0.001	0.0044	0.0037	0.0135	0.0012		Roseburia	0.0001	0	0	0	0	0	0.0013	0.001	0.0044	0.0037	0.0135	0.0012
0.004329	Parabacteroides goldsteinii	0.0023	0.0046	0.1087	0.1751	0.1046	0.1927	0.0016	0.0008	0.0019	0.0009	0.0004	0.0025		Parabacteroides	0.0043	0.0082	0.1087	0.1753	0.1046	0.1927	0.0065	0.0043	0.013	0.0032	0.0068	0.0056
0.004329	Anaerobacterium chartisolvens	0.0011	0.0106	0.0272	0.0025	0.0026	0.0119	0.001	0.0002	0.0005	0.0021	0.0006	0.0009		Anaerobacterium	0.0011	0.0106	0.0272	0.0025	0.0026	0.0119	0.001	0.0002	0.0005	0.0021	0.0006	0.0009
0.00433691	Bacteroides rodentium	0.0005	0.0029	0	0	0	0	0.0588	0.0656	0.0338	0.022	0.0296	0.0868		Bacteroides	0.1114	0.0963	0.1351	0.1954	0.2012	0.131	0.31	0.4131	0.2292	0.1218	0.181	0.3502
0.00477182	Parabacteroides merdae	0.0005	0.0002	0	0.0002	0	0	0.0032	0.001	0.004	0.0006	0.0014	0.0009		Acetanaerobacterium	0	0	0	0	0.0003	0.0001	0.001	0.0009	0.0033	0.0009	0.004	0.0003
0.00715478	Acetanaerobacterium elongatum	0	0	0	0	0.0003	0.0001	0.001	0.0009	0.0033	0.0009	0.004	0.0003		Desulfovibrio	0.0171	0.0062	0	0.0002	0	0	0.0207	0.0612	0.0529	0.1185	0.0721	0.0135
0.00779583	Bacteroides sartorii	0.1033	0.09	0	0.0033	0	0	0.2376	0.3292	0.1767	0.0942	0.1421	0.2564		[Eubacterium]	0	0.0002	0	0	0	0	0	0.0006	0.0088	0.0021	0.0103	0.0055
0.00779583	Desulfovibrio vulgaris	0.0171	0.0062	0	0.0002	0	0	0.0207	0.0612	0.0529	0.1185	0.0721	0.0135		Alkalibacter	0.0001	0	0.0002	0.0003	0.0012	0.0003	0	0	0	0	0	0
0.00865801	[Clostridium] cellulolyticum	0.0092	0.0261	0.0614	0.0357	0.0069	0.0157	0.0008	0	0.0004	0.0149	0.0006	0.0036		Eubacterium	0.0093	0.0055	0.0401	0.0732	0.0033	0.0117	0.0019	0.002	0	0.0072	0.0001	0
0.00865801	[Clostridium] papyrosolvens	0.0193	0.0504	0.0008	0.0039	0.0751	0.1061	0.0061	0.0004	0.0007	0.0006	0	0.0002		Victivallis	0	0	0	0	0	0	0.003	0.0015	0.0019	0	0.0005	0.0015
0.00962172	[Eubacterium] tortuosum	0	0	0	0	0	0	0	0.0002	0.0065	0.0015	0.0061	0.0052		Odoribacter	0.0008	0.0006	0	0	0	0	0.0025	0.0023	0.0032	0.0002	0.0016	0.0016
0.00962172	Alkalibacter saccharofermentans	0.0001	0	0.0002	0.0003	0.0012	0.0003	0	0	0	0	0	0		Oscillibacter	0.0318	0.0234	0.0081	0.0111	0.0218	0.02	0.0035	0.0094	0.0011	0.0177	0.003	0.0045
0.00962172	Eubacterium ventriosum	0.0015	0.0016	0.0003	0.0004	0	0.0001	0	0	0	0	0	0		Alistipes	0.0046	0.0022	0	0	0	0	0.0119	0.0143	0.0073	0.001	0.0032	0.0171
0.00962172	Victivallis vadensis	0	0	0	0	0	0	0.003	0.0015	0.0019	0	0.0005	0.0015		Defluviitalea	0.0035	0.0024	0.0008	0.0004	0.0005	0	0.0001	0.0001	0	0	0	0
0.0115189	Odoribacter splanchnicus	0.0008	0.0006	0	0	0	0	0.0025	0.0023	0.0032	0.0002	0.0016	0.0016		Erysipelatoclostridium	0	0	0	0	0	0	0.0001	0	0.0009	0.0008	0.0009	0
0.0124359	Bacteroides acidifaciens	0.0071	0.003	0	0.0004	0	0	0.0075	0.0131	0.0167	0.0054	0.0084	0.0069		Lactobacillus	0.0051	0.0046	0	0	0.0035	0.0123	0	0	0	0	0	0
0.0129066	Eubacterium siraeum	0.0078	0.0039	0.0398	0.0728	0.0033	0.0116	0.0019	0.002	0	0.0072	0.0001	0		Alkalibaculum	0.0004	0.0005	0.0017	0.0004	0	0	0	0	0	0	0	0
0.0151515	Oscillibacter ruminantium	0.0318	0.0234	0.0081	0.0111	0.0218	0.02	0.0035	0.0094	0.0011	0.0177	0.003	0.0045		Anaerostipes	0	0	0	0	0	0	0	0.0001	0.0001	0.0004	0.0001	0
0.0151515	[Clostridium] leptum	0.0068	0.0192	0.0027	0.0023	0.0017	0.0081	0.0007	0.0007	0.0026	0.0009	0.0023	0.0005		Blautia	0	0	0	0	0	0	0	0.0001	0	0.0002	0.0003	0.0001
0.0167114	[Eubacterium] infirmum	0	0.0002	0	0	0	0	0	0.0004	0.0023	0.0006	0.0042	0.0003		Desulfotomaculum	0	0	0.0025	0.0011	0.0008	0.0006	0	0	0	0	0	0
0.0181009	Alistipes finegoldii	0.0046	0.0022	0	0	0	0	0.0119	0.0143	0.0073	0.001	0.0032	0.0171		Peptococcus	0	0	0.0001	0.0001	0.001	0.0007	0	0	0	0	0	0
0.0193734	Ruminococcus bromii	0.0002	0.0131	0.0117	0.0063	0.0093	0.0074	0	0	0.0007	0	0.0003	0.0006		Acetivibrio	0.0007	0.0016	0.001	0.0005	0	0	0	0	0	0	0	0
0.0249921	Defluviitalea saccharophila	0.0035	0.0024	0.0008	0.0004	0.0005	0	0.0001	0.0001	0	0	0	0		Ethanoligenens	0	0	0.0006	0.0001	0.0008	0.002	0	0	0	0	0	0
0.0277684	Bacteroides chinchillae	0.0005	0.0004	0	0	0	0	0.0061	0.0052	0.002	0.0002	0.0009	0.0001		Anaerovorax	0.0021	0.0029	0.0012	0.0009	0.0009	0.0019	0.0001	0.0005	0.0014	0.0006	0.0012	0.0008
0.0277684	Parabacteroides distasonis	0.0015	0.0034	0	0	0	0	0.0017	0.0025	0.0071	0.0017	0.005	0.0022		Parasutterella	0.0046	0.0013	0.0028	0.0082	0.028	0.0209	0.0012	0.0025	0.0058	0.0009	0.0024	0.0013
0.0277684	[Clostridium] scindens	0	0	0.0002	0	0	0.0001	0.0031	0.0001	0.0008	0.0012	0.0001	0.0012
0.0284407	Bacteroides caccae	0	0	0.1351	0.1917	0.2012	0.131	0	0	0	0	0	0
0.0284407	Erysipelatoclostridium ramosum	0	0	0	0	0	0	0.0001	0	0.0009	0.0008	0.0009	0
0.0284407	Lactobacillus rogosae	0.0051	0.0046	0	0	0.0035	0.0123	0	0	0	0	0	0
0.0284407	Alkalibaculum bacchi	0.0004	0.0005	0.0017	0.0004	0	0	0	0	0	0	0	0
0.0284407	[Clostridium] colinum	0	0	0.0003	0.0004	0.0041	0.0006	0	0	0	0	0	0
0.0284407	Anaerostipes hadrus	0	0	0	0	0	0	0	0.0001	0.0001	0.0004	0.0001	0
0.0284407	Blautia producta	0	0	0	0	0	0	0	0.0001	0	0.0002	0.0003	0.0001
0.0284407	Desulfotomaculum varum	0	0	0.0025	0.0011	0.0008	0.0006	0	0	0	0	0	0
0.0284407	Peptococcus niger	0	0	0.0001	0.0001	0.001	0.0007	0	0	0	0	0	0
0.0284407	[Clostridium] stercorarium	0	0	0.0001	0.0116	0.0001	0.0052	0	0	0	0	0	0
0.0284407	Acetivibrio cellulolyticus	0.0007	0.0016	0.001	0.0005	0	0	0	0	0	0	0	0
0.0284407	Ethanoligenens harbinense	0	0	0.0006	0.0001	0.0008	0.002	0	0	0	0	0	0
0.0411255	Anaerovorax odorimutans	0.0021	0.0029	0.0012	0.0009	0.0009	0.0019	0.0001	0.0005	0.0014	0.0006	0.0012	0.0008
0.0411255	Parasutterella excrementihominis	0.0046	0.0013	0.0028	0.0082	0.028	0.0209	0.0012	0.0025	0.0058	0.0009	0.0024	0.0013
0.0415959	Ruminococcus albus	0.0122	0.0019	0.0047	0.0005	0.0471	0.0033	0	0.0007	0	0.0055	0	0

## Sheet: 6wF
Dataset S1. List of species used for PAC. The list of microbial species used for generation of PCA biplots. Microbial species with statistically significant relative OTU abundance in the metagenome were used for PCA analysis.
p-value	Species	6w.F.C1	6w.F.C2	6w.F.C3	6w.F.C4	6w.F.C5	6w.F.C6	6w.F.HF1	6w.F.HF2	6w.F.HF3	6w.F.HF4	6w.F.HF5	6w.F.HF6		Genus	6w.F.C1	6w.F.C2	6w.F.C3	6w.F.C4	6w.F.C5	6w.F.C6	6w.F.HF1	6w.F.HF2	6w.F.HF3	6w.F.HF4	6w.F.HF5	6w.F.HF6		Phylum	6w.F.C1	6w.F.C2	6w.F.C3	6w.F.C4	6w.F.C5	6w.F.C6	6w.F.HF1	6w.F.HF2	6w.F.HF3	6w.F.HF4	6w.F.HF5	6w.F.HF6
0.0021645	Intestinimonas butyriciproducens	0.0427	0.0292	0.0308	0.1192	0.0457	0.0416	0.0063	0.02	0.0087	0.0104	0.0115	0.0063		Intestinimonas	0.0427	0.0292	0.0308	0.1192	0.0457	0.0416	0.0063	0.02	0.0087	0.0104	0.0115	0.0063		Firmicutes	0.1704	0.1542	0.1921	0.3055	0.2505	0.1862	0.0651	0.1098	0.047	0.0466	0.0838	0.0714
0.0021645	[Clostridium] lactatifermentans	0.0004	0.0001	0.0007	0.0002	0	0.001	0.0066	0.0046	0.0041	0.0026	0.0056	0.002		[Clostridium]	0.0244	0.0256	0.036	0.0445	0.0673	0.0295	0.0104	0.0095	0.007	0.0047	0.0132	0.0074		Lentisphaerae	0	0.0001	0	0	0	0	0.0035	0.0006	0.0006	0.0006	0.0021	0.0012
0.0021645	Anaerobacterium chartisolvens	0.0011	0.005	0.0091	0.0028	0.0073	0.0021	0.0002	0.0009	0.0004	0.0002	0.0003	0.0002		Anaerobacterium	0.0011	0.005	0.0091	0.0028	0.0073	0.0021	0.0002	0.0009	0.0004	0.0002	0.0003	0.0002		Bacteroidetes	0.1179	0.1355	0.3552	0.3187	0.3407	0.3703	0.3785	0.226	0.3359	0.3412	0.4434	0.4054
0.0021645	Ruminococcus champanellensis	0.0122	0.0055	0.0074	0.0299	0.0066	0.0236	0.0011	0.0033	0.0006	0.0004	0.0031	0.0012		Ruminococcus	0.0297	0.0178	0.0252	0.0576	0.0378	0.0488	0.0011	0.0033	0.0007	0.0026	0.0031	0.002		Proteobacteria	0.0081	0.0022	0.0032	0.0455	0.001	0.0084	0.0455	0.0508	0.0574	0.047	0.0554	0.0463
0.0021645	Sporobacter termitidis	0.0032	0.0016	0.0023	0.003	0.0023	0.0017	0.0003	0.0006	0.0006	0.0006	0.0005	0.0007		Sporobacter	0.0032	0.0016	0.0023	0.003	0.0023	0.0017	0.0003	0.0006	0.0006	0.0006	0.0005	0.0007		Verrucomicrobia	0.0734	0.145	0.0188	0.0917	0.0145	0.0542	0.216	0.3288	0.1788	0.1318	0.1127	0.1286
0.00277843	[Clostridium] scindens	0	0	0	0	0	0	0.0014	0.0021	0.0013	0.0001	0.0009	0.0019		Roseburia	0	0	0	0	0	0	0.0001	0.0012	0.0002	0.0002	0.0027	0.0006
0.00277843	Roseburia hominis	0	0	0	0	0	0	0.0001	0.0012	0.0002	0.0002	0.0027	0.0006		Victivallis	0	0.0001	0	0	0	0	0.0035	0.0006	0.0006	0.0006	0.0021	0.0012
0.00366455	Ruminococcus bromii	0.0099	0.0101	0.0007	0.0046	0.0137	0.0004	0	0	0	0	0	0.0004		Vallitalea	0.0466	0.0584	0.0327	0.0064	0.0632	0.018	0.0007	0.003	0.0021	0.0064	0.0048	0.0013
0.00366455	Victivallis vadensis	0	0.0001	0	0	0	0	0.0035	0.0006	0.0006	0.0006	0.0021	0.0012		Acetatifactor	0.0001	0.0003	0.0005	0.0001	0	0.0013	0.0009	0.0028	0.0113	0.0083	0.0069	0.0037
0.004329	Vallitalea pronyensis	0.0466	0.0584	0.0327	0.0064	0.0632	0.018	0.0007	0.003	0.0021	0.0064	0.0048	0.0013		Odoribacter	0.0006	0.001	0	0	0	0	0.0033	0.0022	0.0013	0.0034	0.003	0.0022
0.004329	Acetatifactor muris	0.0001	0.0003	0.0005	0.0001	0	0.0013	0.0009	0.0028	0.0113	0.0083	0.0069	0.0037		Bacteroides	0.0925	0.116	0.0614	0.1323	0.1568	0.1204	0.3452	0.1983	0.3035	0.2896	0.4055	0.3665
0.00433691	Odoribacter splanchnicus	0.0006	0.001	0	0	0	0	0.0033	0.0022	0.0013	0.0034	0.003	0.0022		Parabacteroides	0.0045	0.0041	0.2938	0.1864	0.1839	0.2499	0.0069	0.0046	0.0067	0.0028	0.0084	0.0042
0.00433691	Bacteroides acidifaciens	0.0034	0.0038	0	0	0	0	0.0058	0.0057	0.0174	0.0087	0.0081	0.0072		Alistipes	0.0038	0.0016	0	0	0	0	0.0109	0.0063	0.0044	0.0077	0.0096	0.0145
0.00433691	Bacteroides rodentium	0.0027	0.0035	0	0	0	0	0.035	0.0269	0.0481	0.0388	0.0279	0.0844		Gemmiger	0.0001	0.0002	0	0	0	0	0.0002	0.0013	0.0006	0.0002	0.0008	0.0002
0.00433691	Parabacteroides merdae	0.0006	0.0007	0	0	0	0	0.0023	0.0014	0.0025	0.0007	0.0015	0.0007		Desulfovibrio	0.0081	0.0022	0	0	0	0	0.0455	0.0508	0.0574	0.047	0.0554	0.0463
0.00433691	Alistipes finegoldii	0.0036	0.0014	0	0	0	0	0.0104	0.0056	0.004	0.0075	0.0091	0.0141		Desulfitispora	0.0003	0.0002	0	0	0	0	0.0003	0.0004	0.002	0.0007	0.0018	0.001
0.00433691	Gemmiger formicilis	0.0001	0.0002	0	0	0	0	0.0002	0.0013	0.0006	0.0002	0.0008	0.0002		Christensenella	0.003	0.0044	0.0053	0.0028	0.0072	0.0042	0.0006	0.0038	0.0011	0.0007	0.0023	0.0004
0.00433691	Desulfovibrio desulfuricans	0.0008	0.0005	0	0	0	0	0.001	0.0024	0.0018	0.002	0.0014	0.001		[Eubacterium]	0	0	0	0	0	0	0.0002	0.0002	0.0018	0.0022	0.0001	0
0.00433691	Desulfovibrio vulgaris	0.0073	0.0017	0	0	0	0	0.0445	0.0484	0.0556	0.045	0.054	0.0453		Lactobacillus	0.0004	0.0006	0.001	0	0.0006	0.0021	0	0	0	0	0	0
0.00477182	Bacteroides sartorii	0.0807	0.1042	0	0.0001	0	0	0.2927	0.1593	0.2309	0.2354	0.3621	0.2578		Alkalibaculum	0.0005	0.0002	0.0006	0.0001	0.0014	0.0018	0	0	0	0	0.0002	0
0.00477182	Ruminococcus albus	0.0076	0.0022	0.0162	0.0204	0.0174	0.0247	0	0	0.0001	0.0022	0	0.0004		Eubacterium	0.0008	0.001	0.0018	0.0007	0.0002	0.0004	0	0	0	0.0002	0.0005	0.0002
0.00715478	Desulfitispora alkaliphila	0.0003	0.0002	0	0	0	0	0.0003	0.0004	0.002	0.0007	0.0018	0.001		Catabacter	0.0001	0.0002	0.0017	0.0005	0.0003	0.0047	0.0001	0.0003	0.0001	0	0.0001	0
0.00865801	Christensenella minuta	0.003	0.0044	0.0053	0.0028	0.0072	0.0042	0.0006	0.0038	0.0011	0.0007	0.0023	0.0004		Akkermansia	0.0734	0.145	0.0188	0.0917	0.0145	0.0542	0.216	0.3288	0.1788	0.1318	0.1127	0.1286
0.00865801	[Clostridium] cellulolyticum	0.0149	0.0172	0.0109	0.0019	0.0367	0.0067	0.0001	0.0008	0.0001	0.0001	0.003	0.0029		Barnesiella	0.0165	0.0128	0	0	0	0	0.0122	0.0146	0.02	0.0377	0.0169	0.018
0.00962172	[Eubacterium] cylindroides	0	0	0	0	0	0	0.0002	0.0002	0.0018	0.0022	0.0001	0		[Bacteroides]	0	0	0.0015	0.0009	0.001	0.0021	0	0	0	0	0	0
0.00962172	Lactobacillus rogosae	0.0004	0.0006	0.001	0	0.0006	0.0021	0	0	0	0	0	0		Desulfonispora	0	0	0.0005	0.0011	0.0012	0.0048	0	0	0	0	0	0
0.00962172	[Clostridium] stercorarium	0.0004	0	0.0062	0.0058	0.0188	0.0002	0	0	0	0	0	0		Desulfotomaculum	0.0073	0.0034	0.0077	0.0059	0.0039	0.0127	0.0008	0.0019	0.0025	0.0009	0.0025	0.004
0.0100646	Alkalibaculum bacchi	0.0005	0.0002	0.0006	0.0001	0.0014	0.0018	0	0	0	0	0.0002	0		Peptococcus	0	0	0.0004	0.0003	0.0003	0.0007	0	0	0	0	0	0
0.0115189	Alistipes indistinctus	0.0002	0.0002	0	0	0	0	0.0005	0.0007	0.0004	0.0002	0.0005	0.0004		Acetivibrio	0.0008	0.0023	0	0.0001	0.0008	0	0	0	0	0	0	0
0.0124359	Eubacterium ventriosum	0.0008	0.001	0.0018	0.0007	0.0002	0.0004	0	0	0	0.0002	0.0005	0.0002		Phascolarctobacterium	0	0	0	0	0	0	0.0398	0.0562	0	0	0.0276	0.0372
0.0129066	Catabacter hongkongensis	0.0001	0.0002	0.0017	0.0005	0.0003	0.0047	0.0001	0.0003	0.0001	0	0.0001	0		Rhodospirillum	0	0	0.0032	0.0455	0.001	0.0084	0	0	0	0	0	0
0.0151515	[Clostridium] leptum	0.0087	0.0081	0.0029	0.002	0.0037	0.0048	0.0021	0.0017	0.0012	0.0015	0.003	0.0006		Turicibacter	0	0	0.0002	0.0006	0.0002	0.0001	0.0018	0.0012	0.003	0.0049	0.0002	0.0006
0.0151515	Akkermansia muciniphila	0.0734	0.145	0.0188	0.0917	0.0145	0.0542	0.216	0.3288	0.1788	0.1318	0.1127	0.1286		Clostridium	0	0	0	0.0005	0	0.0001	0.0008	0.0006	0.0011	0.0003	0	0.0006
0.0181009	Bacteroides thetaiotaomicron	0.0008	0.0004	0	0	0	0	0.0007	0.0007	0.0011	0.001	0.0009	0.0006		Gracilibacter	0.0008	0.0014	0.0255	0.0542	0.0006	0.0006	0.0001	0.0008	0.0001	0.0001	0.0007	0
0.0181009	Barnesiella viscericola	0.0165	0.0128	0	0	0	0	0.0122	0.0146	0.02	0.0377	0.0169	0.018		Oscillibacter	0.0085	0.0024	0.0093	0.0042	0.0092	0.0089	0.0004	0.0018	0.0037	0.003	0.004	0.005
0.0249921	[Clostridium] amygdalinum	0	0.0002	0.0001	0	0	0	0.0002	0.0003	0.0003	0.0004	0.0007	0
0.0277684	Bacteroides chinchillae	0.0011	0.0011	0	0	0	0	0.0077	0.0014	0.0003	0.0022	0.0041	0.0005
0.0284407	Bacteroides caccae	0	0	0.0614	0.1322	0.1568	0.1203	0	0	0	0	0	0
0.0284407	[Bacteroides] pectinophilus	0	0	0.0015	0.0009	0.001	0.0021	0	0	0	0	0	0
0.0284407	[Clostridium] colinum	0	0	0.0003	0.0044	0.0001	0.0008	0	0	0	0	0	0
0.0284407	Desulfonispora thiosulfatigenes	0	0	0.0005	0.0011	0.0012	0.0048	0	0	0	0	0	0
0.0284407	Desulfotomaculum varum	0	0	0.0008	0.0001	0.0021	0.0003	0	0	0	0	0	0
0.0284407	Peptococcus niger	0	0	0.0004	0.0003	0.0003	0.0007	0	0	0	0	0	0
0.0284407	[Clostridium] alkalicellulosi	0	0	0.0009	0.0018	0.0034	0.0024	0	0	0	0	0	0
0.0284407	[Clostridium] caenicola	0	0	0.0006	0.0004	0.0008	0.0014	0	0	0	0	0	0
0.0284407	[Clostridium] cellobioparum	0	0	0.0134	0.028	0.0038	0.0122	0	0	0	0	0	0
0.0284407	Acetivibrio cellulolyticus	0.0008	0.0023	0	0.0001	0.0008	0	0	0	0	0	0	0
0.0284407	Ruminococcus callidus	0	0	0.0009	0.0027	0.0001	0.0001	0	0	0	0	0	0
0.0284407	Phascolarctobacterium faecium	0	0	0	0	0	0	0.0398	0.0562	0	0	0.0276	0.0372
0.0284407	Rhodospirillum rubrum	0	0	0.0032	0.0455	0.001	0.0084	0	0	0	0	0	0
0.02948	Bacteroides uniformis	0.0038	0.003	0	0	0	0.0001	0.0033	0.0043	0.0057	0.0035	0.0024	0.016
0.02948	Parabacteroides distasonis	0.0018	0.0018	0	0	0	0.0001	0.0034	0.0016	0.0025	0.0003	0.0022	0.002
0.0303479	Turicibacter sanguinis	0	0	0.0002	0.0006	0.0002	0.0001	0.0018	0.0012	0.003	0.0049	0.0002	0.0006
0.0379415	Clostridium disporicum	0	0	0	0.0005	0	0.0001	0.0008	0.0006	0.0011	0.0003	0	0.0006
0.0411255	Parabacteroides goldsteinii	0.0021	0.0016	0.2938	0.1864	0.1839	0.2498	0.0012	0.0016	0.0017	0.0018	0.0047	0.0015
0.0411255	Gracilibacter thermotolerans	0.0008	0.0014	0.0255	0.0542	0.0006	0.0006	0.0001	0.0008	0.0001	0.0001	0.0007	0
0.0411255	Oscillibacter valericigenes	0.0085	0.0024	0.0093	0.0042	0.0092	0.0089	0.0004	0.0018	0.0037	0.003	0.004	0.005
0.0411255	Desulfotomaculum halophilum	0.0073	0.0034	0.0069	0.0058	0.0018	0.0124	0.0008	0.0019	0.0025	0.0009	0.0025	0.004

## Sheet: 2yrM
Dataset S1. List of species used for PAC. The list of microbial species used for generation of PCA biplots. Microbial species with statistically significant relative OTU abundance in the metagenome were used for PCA analysis.
p-value	Species	2yr.M.C1	2yr.M.C2	2yr.M.C3	2yr.M.C4	2yr.M.HF1	2yr.M.HF2	2yr.M.HF3	2yr.M.HF4		Genus	2yr.M.C1	2yr.M.C2	2yr.M.C3	2yr.M.C4	2yr.M.HF1	2yr.M.HF2	2yr.M.HF3	2yr.M.HF4		Phylum	2yr.M.C1	2yr.M.C2	2yr.M.C3	2yr.M.C4	2yr.M.HF1	2yr.M.HF2	2yr.M.HF3	2yr.M.HF4
0.0150785	[Clostridium] stercorarium	0.0033	0.005	0.0012	0.0077	0	0	0	0		[Clostridium]	0.0307	0.0552	0.0387	0.0522	0.2294	0.1772	0.0764	0.1834		Firmicutes	0.0565	0.129	0.0892	0.104	0.2846	0.258	0.2115	0.2484
0.0150785	[Clostridium] straminisolvens	0	0.0003	0	0	0.0018	0.0046	0.0031	0.0012		Barnesiella	0.2566	0.291	0.1013	0.0707	0.0189	0.0208	0.0076	0.0154		Bacteroidetes	0.2651	0.3022	0.1347	0.1275	0.0557	0.0711	0.014	0.0285
0.015873	Barnesiella intestinihominis	0.2566	0.291	0.1013	0.0707	0.0189	0.0208	0.0076	0.0154		Parabacteroides	0.0043	0.0063	0.0016	0.0016	0.0365	0.0499	0.0064	0.0131		Tenericutes	0	0	0	0	0.0006	0.0002	0	0.0026
0.015873	Parabacteroides goldsteinii	0.0043	0.0063	0.0016	0.0016	0.0365	0.0499	0.0064	0.0131		Eubacterium	0.0021	0.0011	0.0175	0.0277	0.0046	0.0066	0.0084	0.0058		Proteobacteria	0	0.0001	0.0153	0.0036	0	0	0	0
0.015873	Eubacterium xylanophilum	0.002	0.0011	0.0034	0.002	0.0046	0.0066	0.0084	0.0058		Acetatifactor	0.0007	0.0001	0.0013	0.0005	0.0239	0.009	0.0757	0.0507
0.015873	Acetatifactor muris	0.0007	0.0001	0.0013	0.0005	0.0239	0.009	0.0757	0.0507		Bacteroides	0.0042	0.0048	0.0117	0.0349	0.0003	0.0004	0	0
0.015873	[Clostridium] lactatifermentans	0.0001	0	0.0004	0.0009	0.0019	0.0071	0.0056	0.0041		Turicibacter	0.0038	0.0031	0.0018	0.0016	0.0005	0.0006	0	0
0.015873	[Clostridium] lavalense	0.0004	0.004	0.0051	0	0.1843	0.103	0.0619	0.0667		Pseudoflavonifractor	0.0045	0.0503	0.0121	0.0109	0.0016	0.0064	0.0031	0.0037
0.015873	[Clostridium] cellulolyticum	0.0086	0.0094	0.0184	0.0076	0.0001	0.0001	0	0.0038		Gracilibacter	0.0089	0.0007	0.0012	0.0016	0.0175	0.0132	0.0437	0.0018
0.015873	[Clostridium] leptum	0.0084	0.0151	0.0045	0.0318	0.0002	0.0013	0.0013	0.0018		Ruminiclostridium	0.002	0.0066	0.0042	0.0038	0.0016	0.0032	0.002	0.0016
0.0179428	[Clostridium] asparagiforme	0.0001	0.0002	0	0	0.0398	0.0606	0.0031	0.0983		[Eubacterium]	0	0	0	0.0001	0.0055	0.0412	0.001	0.0002
0.019451	Bacteroides xylanolyticus	0.0042	0.0048	0.0117	0.0349	0.0003	0.0004	0	0		Ruminococcus	0.0038	0.0119	0.0124	0.0056	0	0	0	0.0011
0.019451	Turicibacter sanguinis	0.0038	0.0031	0.0018	0.0016	0.0005	0.0006	0	0		Acetanaerobacterium	0	0	0	0	0	0.0006	0.0012	0.0001
0.019451	[Clostridium] saccharolyticum	0.0098	0.0209	0.009	0.0041	0.0008	0	0	0.0001		Anaeroplasma	0	0	0	0	0.0006	0.0002	0	0.0026
0.019451	[Clostridium] methylpentosum	0	0.0003	0.0001	0.0001	0.0005	0.0005	0.0014	0.0074		Alloprevotella	0	0.0001	0.0201	0.0203	0	0	0	0
0.031746	Pseudoflavonifractor capillosus	0.0045	0.0503	0.0121	0.0109	0.0016	0.0064	0.0031	0.0037		Desulfovibrio	0	0.0001	0.0153	0.0036	0	0	0	0
0.031746	Gracilibacter thermotolerans	0.0089	0.0007	0.0012	0.0016	0.0175	0.0132	0.0437	0.0018
0.031746	Ruminiclostridium thermocellum	0.002	0.0066	0.0042	0.0038	0.0016	0.0032	0.002	0.0016
0.0342039	[Eubacterium] cylindroides	0	0	0	0.0001	0.0055	0.0412	0.001	0.0002
0.0342039	Ruminococcus champanellensis	0.0038	0.0119	0.0124	0.0056	0	0	0	0.0011
0.0416201	Acetanaerobacterium elongatum	0	0	0	0	0	0.0006	0.0012	0.0001
0.0416201	Anaeroplasma abactoclasticum	0	0	0	0	0.0006	0.0002	0	0.0026
0.0441713	Alloprevotella rava	0	0.0001	0.0201	0.0203	0	0	0	0
0.0441713	Eubacterium ruminantium	0.0001	0	0.0141	0.0257	0	0	0	0
0.0441713	Desulfovibrio vulgaris	0	0.0001	0.0153	0.0036	0	0	0	0

## Sheet: 2yrF
Dataset S1. List of species used for PAC. The list of microbial species used for generation of PCA biplots. Microbial species with statistically significant relative OTU abundance in the metagenome were used for PCA analysis.
p-value	Species	2yr.F.C1	2yr.F.C2	2yr.F.C3	2yr.F.C4	2yr.F.C5	2yr.F.HF1	2yr.F.HF2	2yr.F.HF3	2yr.F.HF4	2yr.F.HF5		Genus	2yr.F.C1	2yr.F.C2	2yr.F.C3	2yr.F.C4	2yr.F.C5	2yr.F.HF1	2yr.F.HF2	2yr.F.HF3	2yr.F.HF4	2yr.F.HF5		Phylum	2yr.F.C1	2yr.F.C2	2yr.F.C3	2yr.F.C4	2yr.F.C5	2yr.F.HF1	2yr.F.HF2	2yr.F.HF3	2yr.F.HF4	2yr.F.HF5
0.00793651	Barnesiella intestinihominis	0.1093	0.1637	0.1384	0.1038	0.1407	0.0343	0.0174	0.0369	0.0363	0.0387		Barnesiella	0.1093	0.1637	0.1384	0.1038	0.1407	0.0343	0.0174	0.0369	0.0363	0.0387		Bacteroidetes	0.1224	0.2421	0.2433	0.1353	0.2499	0.0523	0.0294	0.0494	0.0511	0.053
0.00793651	Parabacteroides distasonis	0.0046	0.0068	0.006	0.0064	0.0094	0.003	0.0023	0.0014	0.0016	0.0013		Parabacteroides	0.0046	0.0068	0.006	0.0064	0.0094	0.003	0.0023	0.0014	0.0016	0.0013		Firmicutes	0.2102	0.1564	0.1706	0.0646	0.1038	0.0145	0.0137	0.0096	0.0098	0.0115
0.00793651	Intestinimonas butyriciproducens	0.1207	0.0607	0.0503	0.0364	0.0443	0.011	0.0083	0.0059	0.0046	0.0103		Intestinimonas	0.1207	0.0607	0.0503	0.0364	0.0443	0.011	0.0083	0.0059	0.0046	0.0103		Proteobacteria	0.0193	0.0126	0.0097	0.0081	0.0202	0.0307	0.1202	0.0358	0.0266	0.1531
0.00793651	Desulfovibrio vulgaris	0.017	0.0107	0.0093	0.0072	0.019	0.0304	0.1196	0.0356	0.0265	0.1527		Desulfovibrio	0.017	0.0107	0.0093	0.0072	0.019	0.0304	0.1196	0.0356	0.0265	0.1527		Verrucomicrobia	0.0195	0.0107	0.0011	0.0172	0.0473	0.1291	0.1477	0.1129	0.0818	0.2611
0.00793651	Akkermansia muciniphila	0.0195	0.0107	0.0011	0.0172	0.0473	0.1291	0.1477	0.1129	0.0818	0.2611		Akkermansia	0.0195	0.0107	0.0011	0.0172	0.0473	0.1291	0.1477	0.1129	0.0818	0.2611
0.00970078	Ruminococcus albus	0.0132	0.0311	0.0006	0.0061	0.0002	0	0	0	0	0.0001		Ruminococcus	0.0235	0.0715	0.005	0.0097	0.0065	0.0001	0.0006	0	0	0.0001
0.00970078	Ruminococcus champanellensis	0.0024	0.0163	0.0034	0.0024	0.004	0	0.0005	0	0	0		Turicibacter	0.0373	0.0043	0.0034	0.0002	0.001	0.0001	0	0	0	0.0001
0.0111594	Turicibacter sanguinis	0.0373	0.0043	0.0034	0.0002	0.001	0.0001	0	0	0	0.0001		Prevotella	0.0016	0.0202	0.0249	0.0031	0.0184	0	0	0.0001	0.0001	0.0003
0.0111594	Ruminococcus bromii	0.0079	0.0241	0.001	0.0012	0.0023	0.0001	0.0001	0	0	0		Alloprevotella	0.0044	0.0294	0.0436	0.0066	0.0567	0.0001	0.0003	0.0013	0.0031	0.0064
0.0119252	Prevotella oralis	0.0016	0.0202	0.0249	0.0031	0.0184	0	0	0.0001	0.0001	0.0003		Gracilibacter	0.0002	0.0005	0.0083	0.0012	0.0037	0.0001	0.0001	0.0001	0	0.0003
0.015873	Alloprevotella rava	0.0044	0.0294	0.0436	0.0066	0.0567	0.0001	0.0003	0.0013	0.0031	0.0064		Parasutterella	0.0023	0.0019	0.0004	0.0009	0.0012	0.0003	0.0006	0.0002	0.0001	0.0004
0.015873	Gracilibacter thermotolerans	0.0002	0.0005	0.0083	0.0012	0.0037	0.0001	0.0001	0.0001	0	0.0003		[Clostridium]	0.0129	0.0036	0.0406	0.0048	0.0259	0.0004	0.003	0.0029	0.0045	0.0001
0.015873	Parasutterella excrementihominis	0.0023	0.0019	0.0004	0.0009	0.0012	0.0003	0.0006	0.0002	0.0001	0.0004		Anaerobacterium	0.0064	0.007	0.0373	0.0012	0.015	0.0021	0.0005	0	0	0.0005
0.0177501	[Clostridium] clariflavum	0.0001	0.0003	0.0046	0.0015	0.0159	0	0.0002	0	0	0		Bacteroides	0	0.0004	0.0011	0.0001	0.0011	0	0	0	0	0
0.0211767	Anaerobacterium chartisolvens	0.0064	0.007	0.0373	0.0012	0.015	0.0021	0.0005	0	0	0.0005		Lactobacillus	0.0028	0.0022	0.0005	0.0001	0	0	0	0	0	0
0.0253699	Bacteroides chinchillae	0	0.0004	0.0011	0.0001	0.0011	0	0	0	0	0		[Bacteroides]	0.0018	0.0006	0	0.0001	0.0002	0	0	0	0	0
0.0253699	Lactobacillus reuteri	0.0028	0.0022	0.0005	0.0001	0	0	0	0	0	0		Anaerostipes	0	0	0	0	0	0.0002	0.0003	0.0007	0.0004	0
0.0253699	[Bacteroides] pectinophilus	0.0018	0.0006	0	0.0001	0.0002	0	0	0	0	0		Roseburia	0.0002	0.0056	0.0187	0.0055	0	0	0	0	0	0
0.0253699	Anaerostipes hadrus	0	0	0	0	0	0.0002	0.0003	0.0007	0.0004	0		Alistipes	0.0025	0.0216	0.0293	0.0153	0.0236	0.0149	0.0094	0.0097	0.01	0.0063
0.0253699	Roseburia intestinalis	0.0002	0.0056	0.0187	0.0055	0	0	0	0	0	0		Ruminiclostridium	0.0044	0.0004	0.0065	0.0054	0.0072	0.0005	0.0009	0	0.0003	0.0001
0.0253699	[Clostridium] stercorarium	0	0.0001	0.0041	0.0002	0.0004	0	0	0	0	0
0.031746	Alistipes putredinis	0.0024	0.0207	0.0223	0.0124	0.019	0.0042	0.0035	0.0013	0.0008	0.0004
0.031746	Alistipes timonensis	0.0001	0.0009	0.007	0.0029	0.0046	0.0107	0.0059	0.0084	0.0092	0.0059
0.031746	Ruminiclostridium thermocellum	0.0044	0.0004	0.0065	0.0054	0.0072	0.0005	0.0009	0	0.0003	0.0001
0.031746	[Clostridium] leptum	0.0128	0.0032	0.0319	0.0031	0.0096	0.0004	0.0028	0.0029	0.0045	0.0001
